# Supplementary material
Source: ML conference proceedings conference paper supplement (https://openaccess.thecvf.com/content/cvpr_2017/html/Sharghi_Query-Focused_Video_Summarization_2017_CVPR_paper.html)
Supplement: Supplementary file 1 [file Sharghi_Query-Focused_Video_Summarization_2017_CVPR_supplemental.pdf]

Archive with 3 entries (2 files):
- 1990-supp/
- 1990-supp/1990-supp.pdf
- 1990-supp/SampleSummary_Query_Chocolate_Street.mp4
